# Supplementary material for: Measuring and Mapping Physical Activity Disparity (PAD) Index Based on Physical Activity Environment for Children
Source: MDPI journal article supplement (doi:10.3390/ijgi12030134), 2023-03-21
Supplement: s1 [file s1]

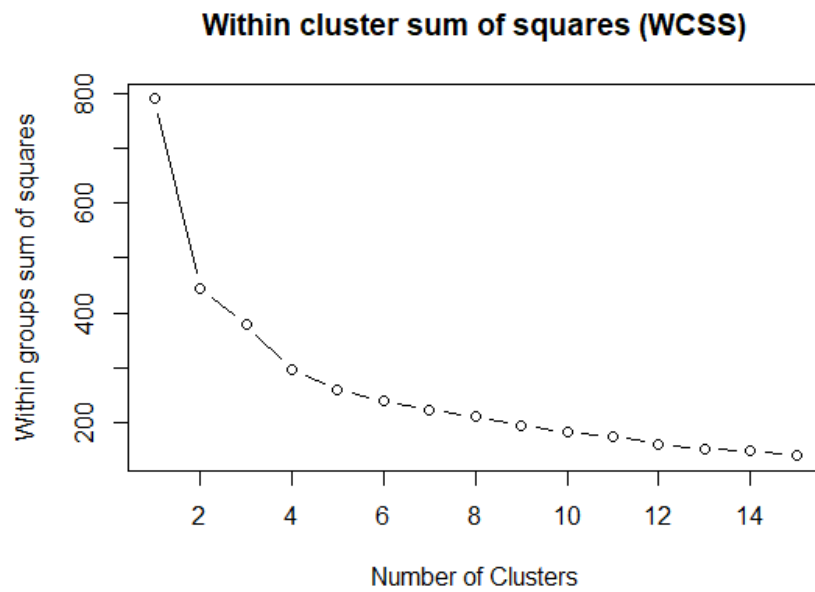

**Figure S1.** Within Cluster Sum of Squares result.

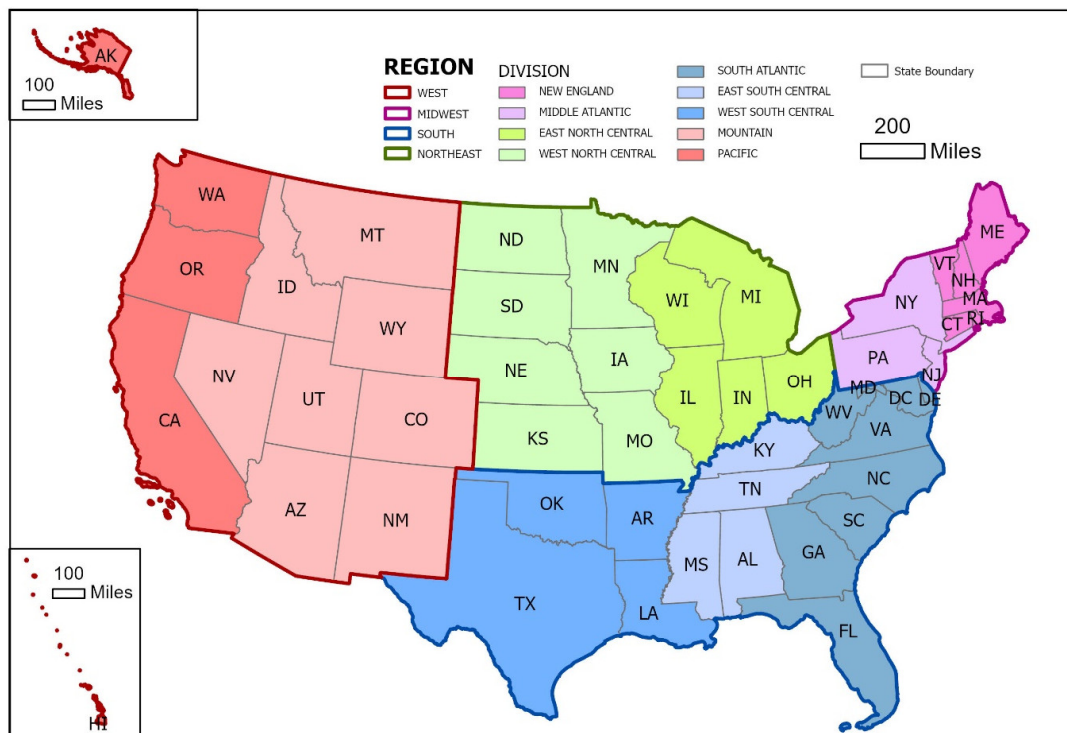

**Figure S2.** Census Regions and Divisions of the United States(Census, 2021).

**Table S1.** List of acronyms.

| <b>Acronym</b>        | <b>Definition</b>                                                            |
|-----------------------|------------------------------------------------------------------------------|
| <b>PA</b>             | Physical activity                                                            |
| <b>PAD</b>            | Physical Activity Disparity                                                  |
| <b>5 As or 5 'A's</b> | Accessibility, Availability, Accommodation, Affordability, and Acceptability |
| <b>SOM</b>            | Self-Organizing Map                                                          |
| <b>GIS</b>            | Geographic Information System                                                |
| <b>ACS</b>            | American Community Survey                                                    |
| <b>NDVI</b>           | Normalized Difference Vegetation Index-                                      |
| <b>NRI</b>            | National Risk Index                                                          |

Census. (2021). Census Regions and Divisions of the United States. Retrieved from [https://www2.census.gov/geo/pdfs/maps-data/maps/reference/us\\_regdiv.pdf](https://www2.census.gov/geo/pdfs/maps-data/maps/reference/us_regdiv.pdf)
